# Supplementary material
Source: PubMed Central journal article supplement (PMC8426154)
Supplement: mmc2.pdf [file mmc2.pdf]

# THE LANCET

## Supplementary appendix

This appendix formed part of the original submission. We post it as supplied by the authors.

Supplement to: Chu D, Khamis A, Akl E, Neumann I, Solo K, Schunemann H. Revisiting the evidence for physical distancing, face masks, and eye protection—Authors' reply. *Lancet* 2021; **398**: 663–64.

Forest plot showing the association of SARS, MERS or COVID-19 exposure proximity with infection

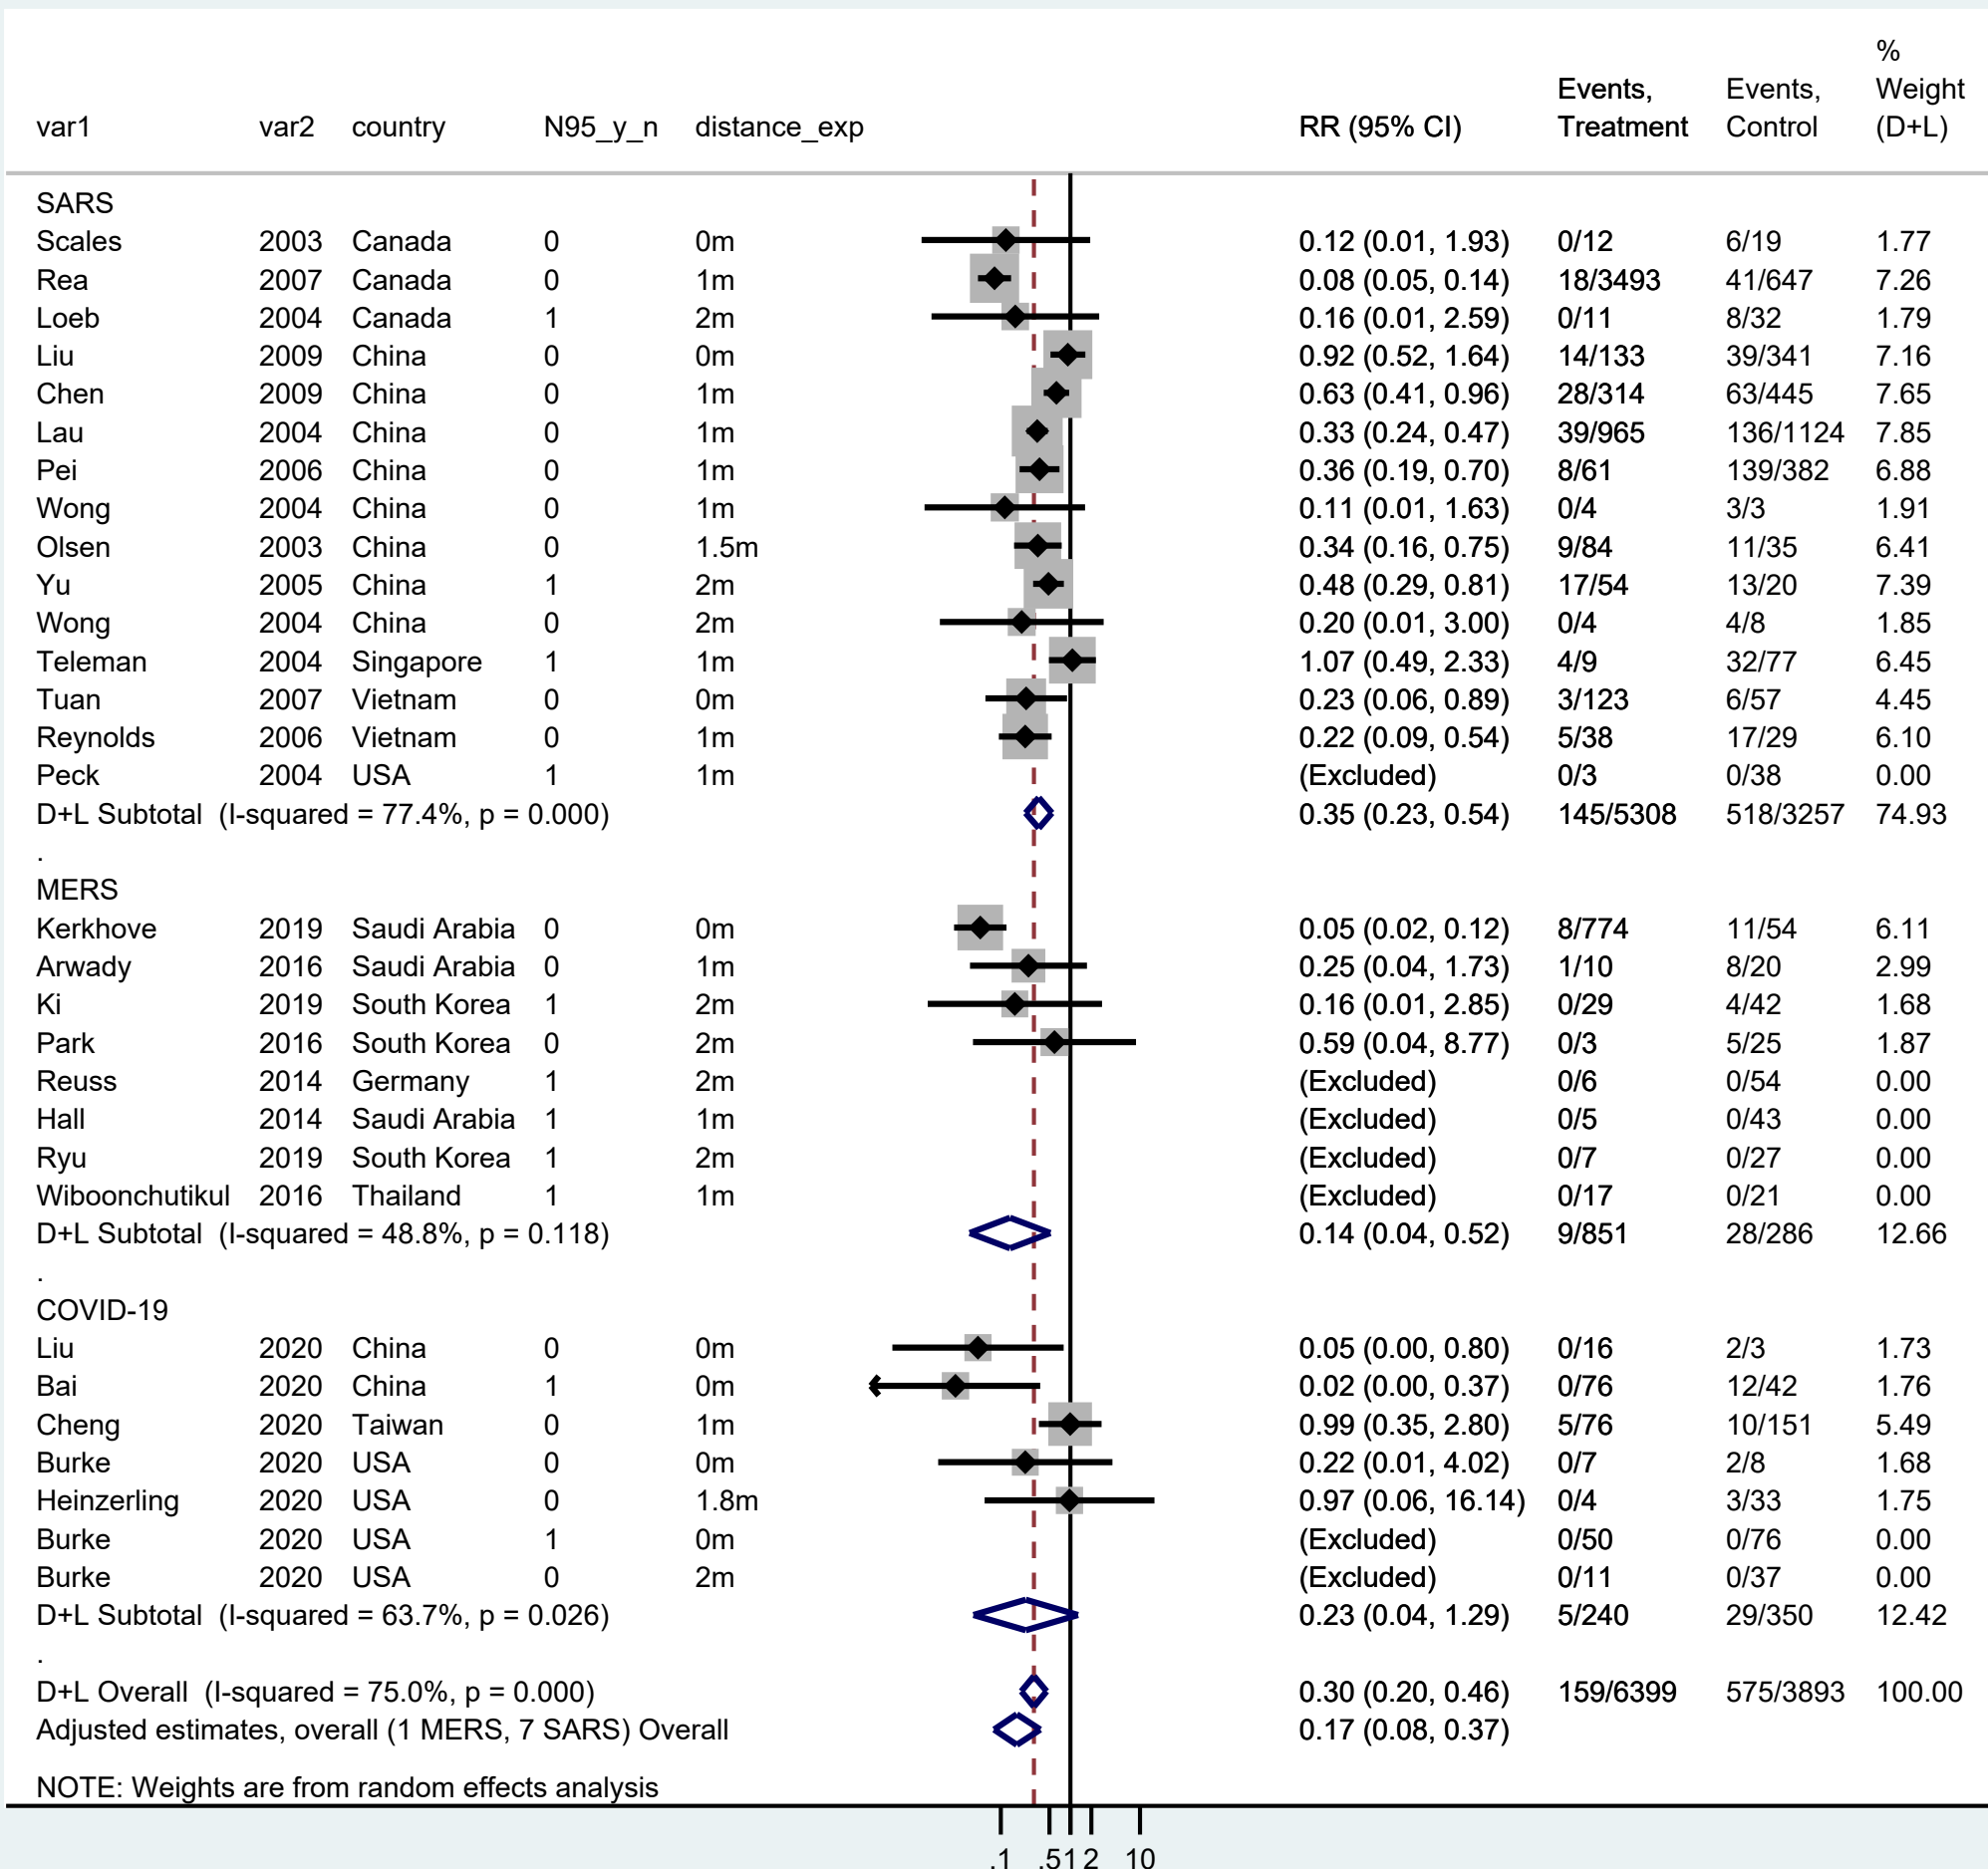

NOTE: Weights are from random effects analysis

Forest plot showing unadjusted estimates for the association of face mask use with viral infection causing COVID-19, SARS, or MERS

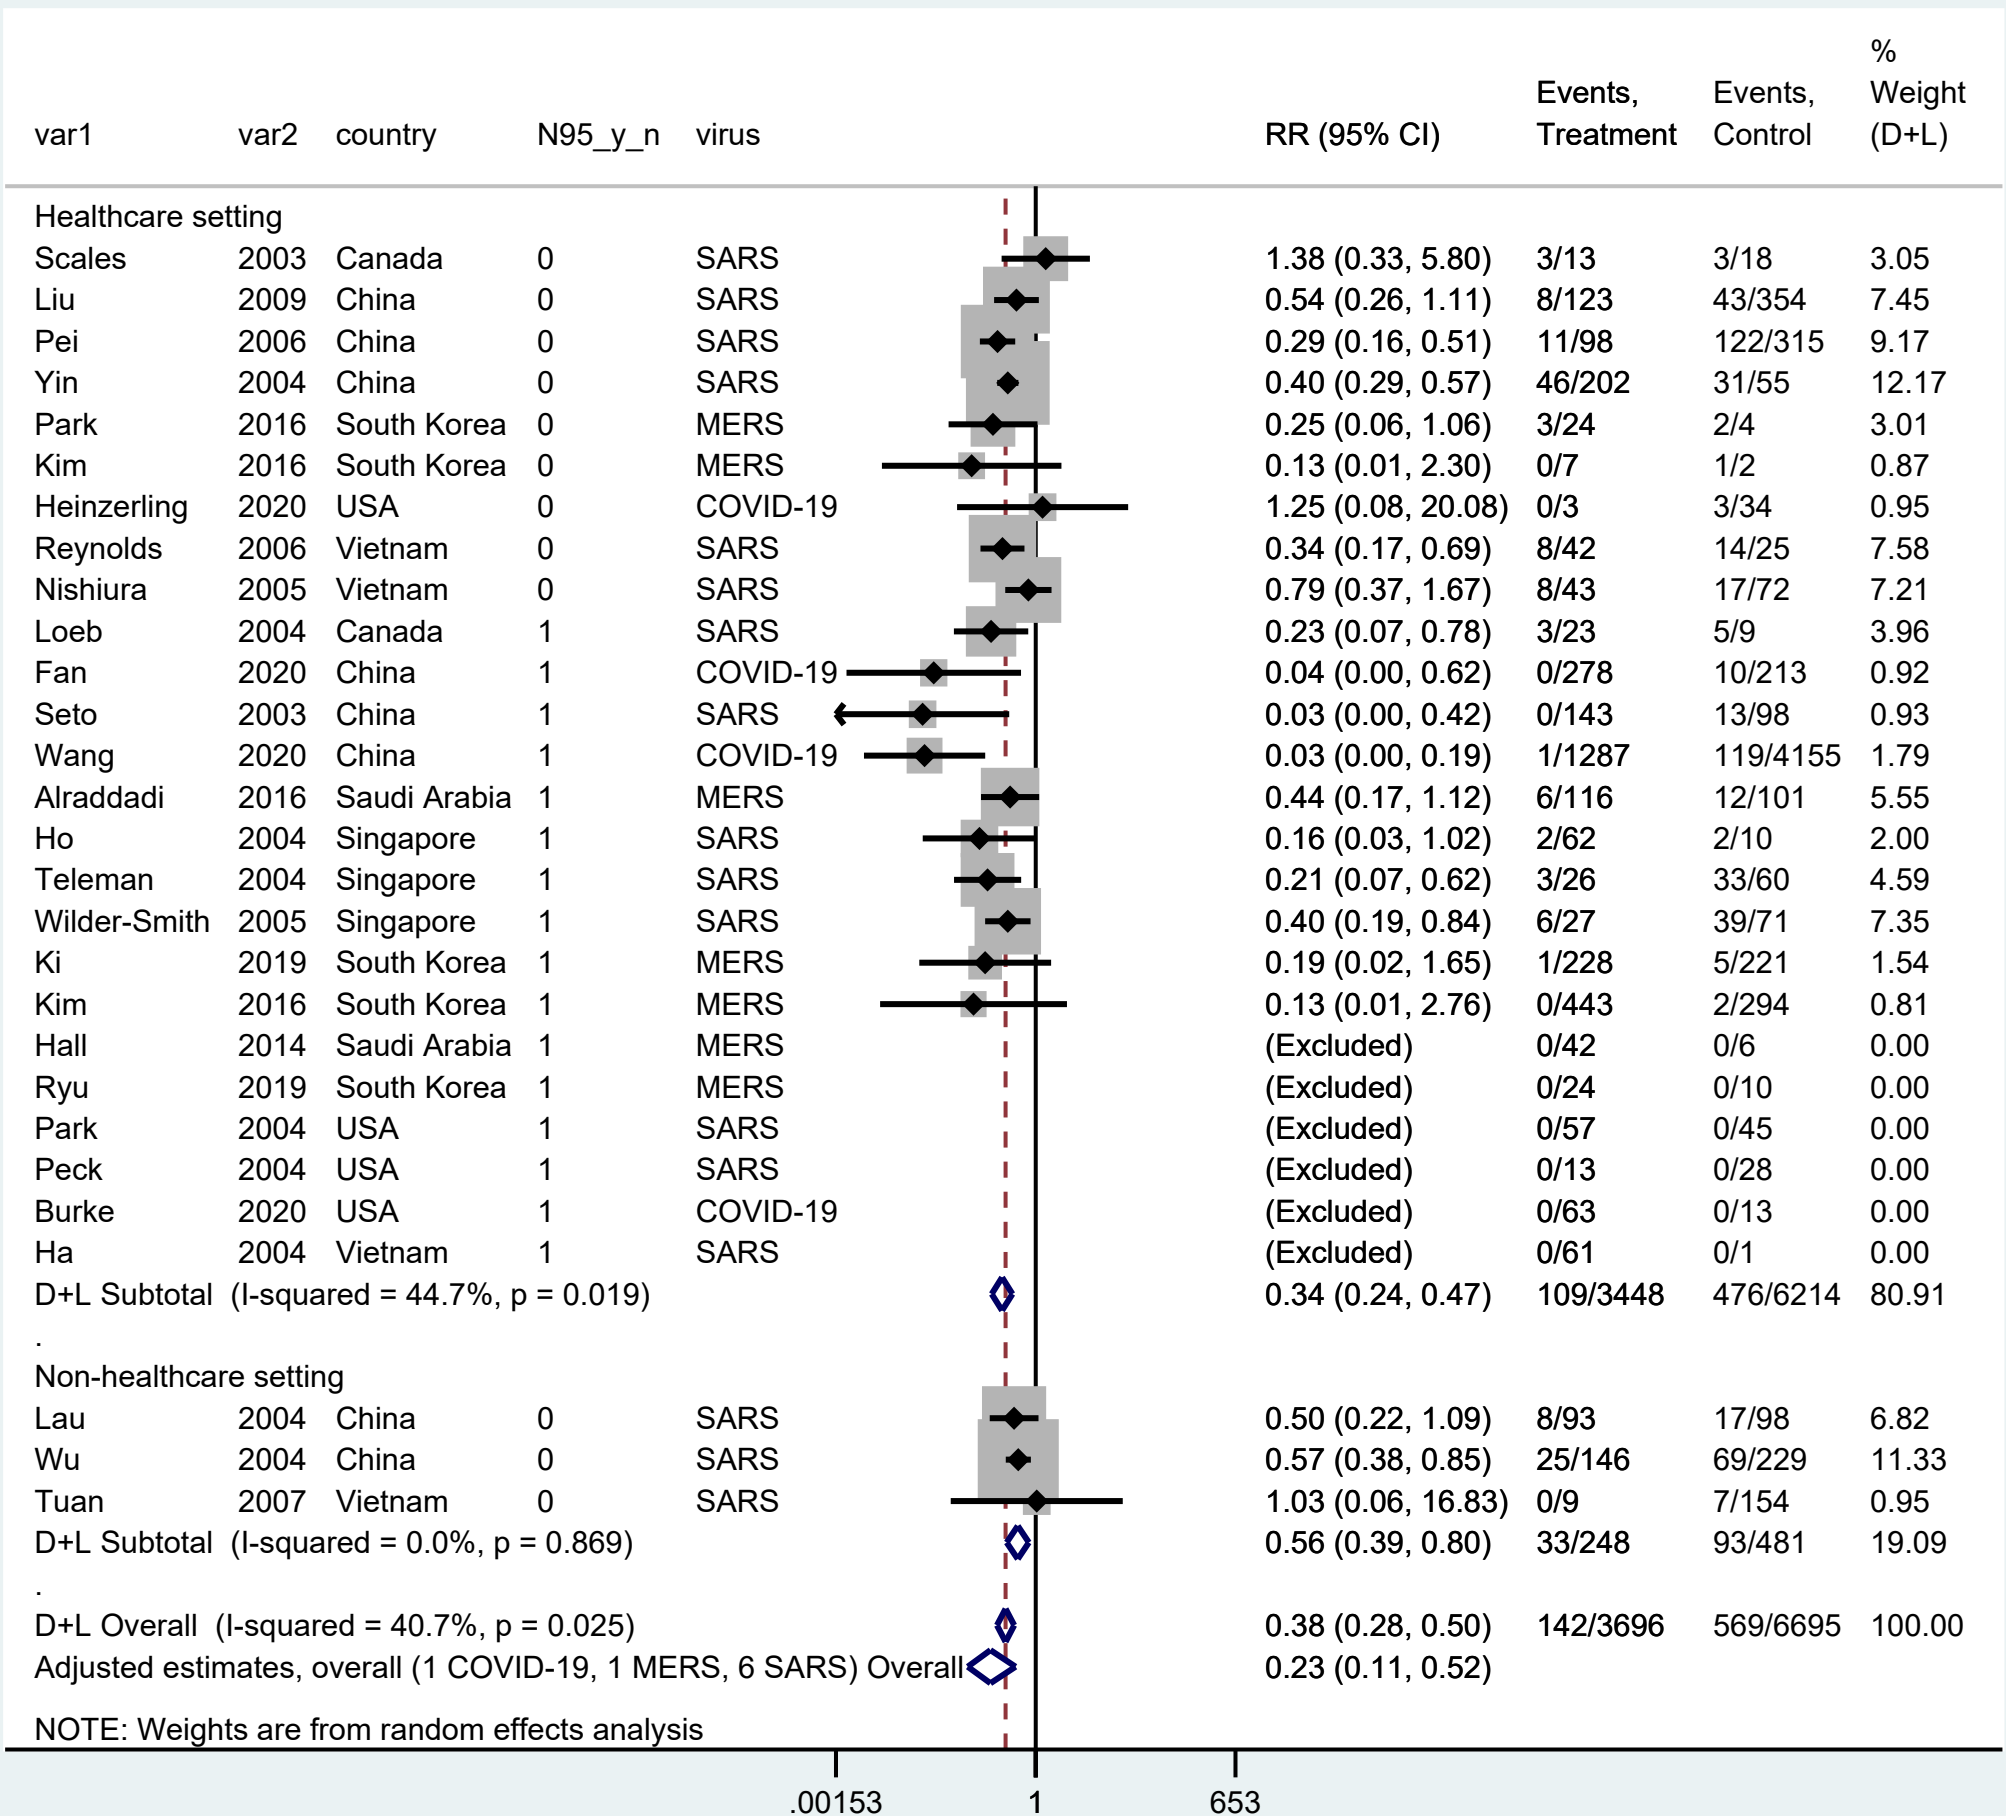

NOTE: Weights are from random effects analysis

Forest plot showing adjusted estimates for the association of face mask use with viral infection causing COVID-19, SARS, or MERS

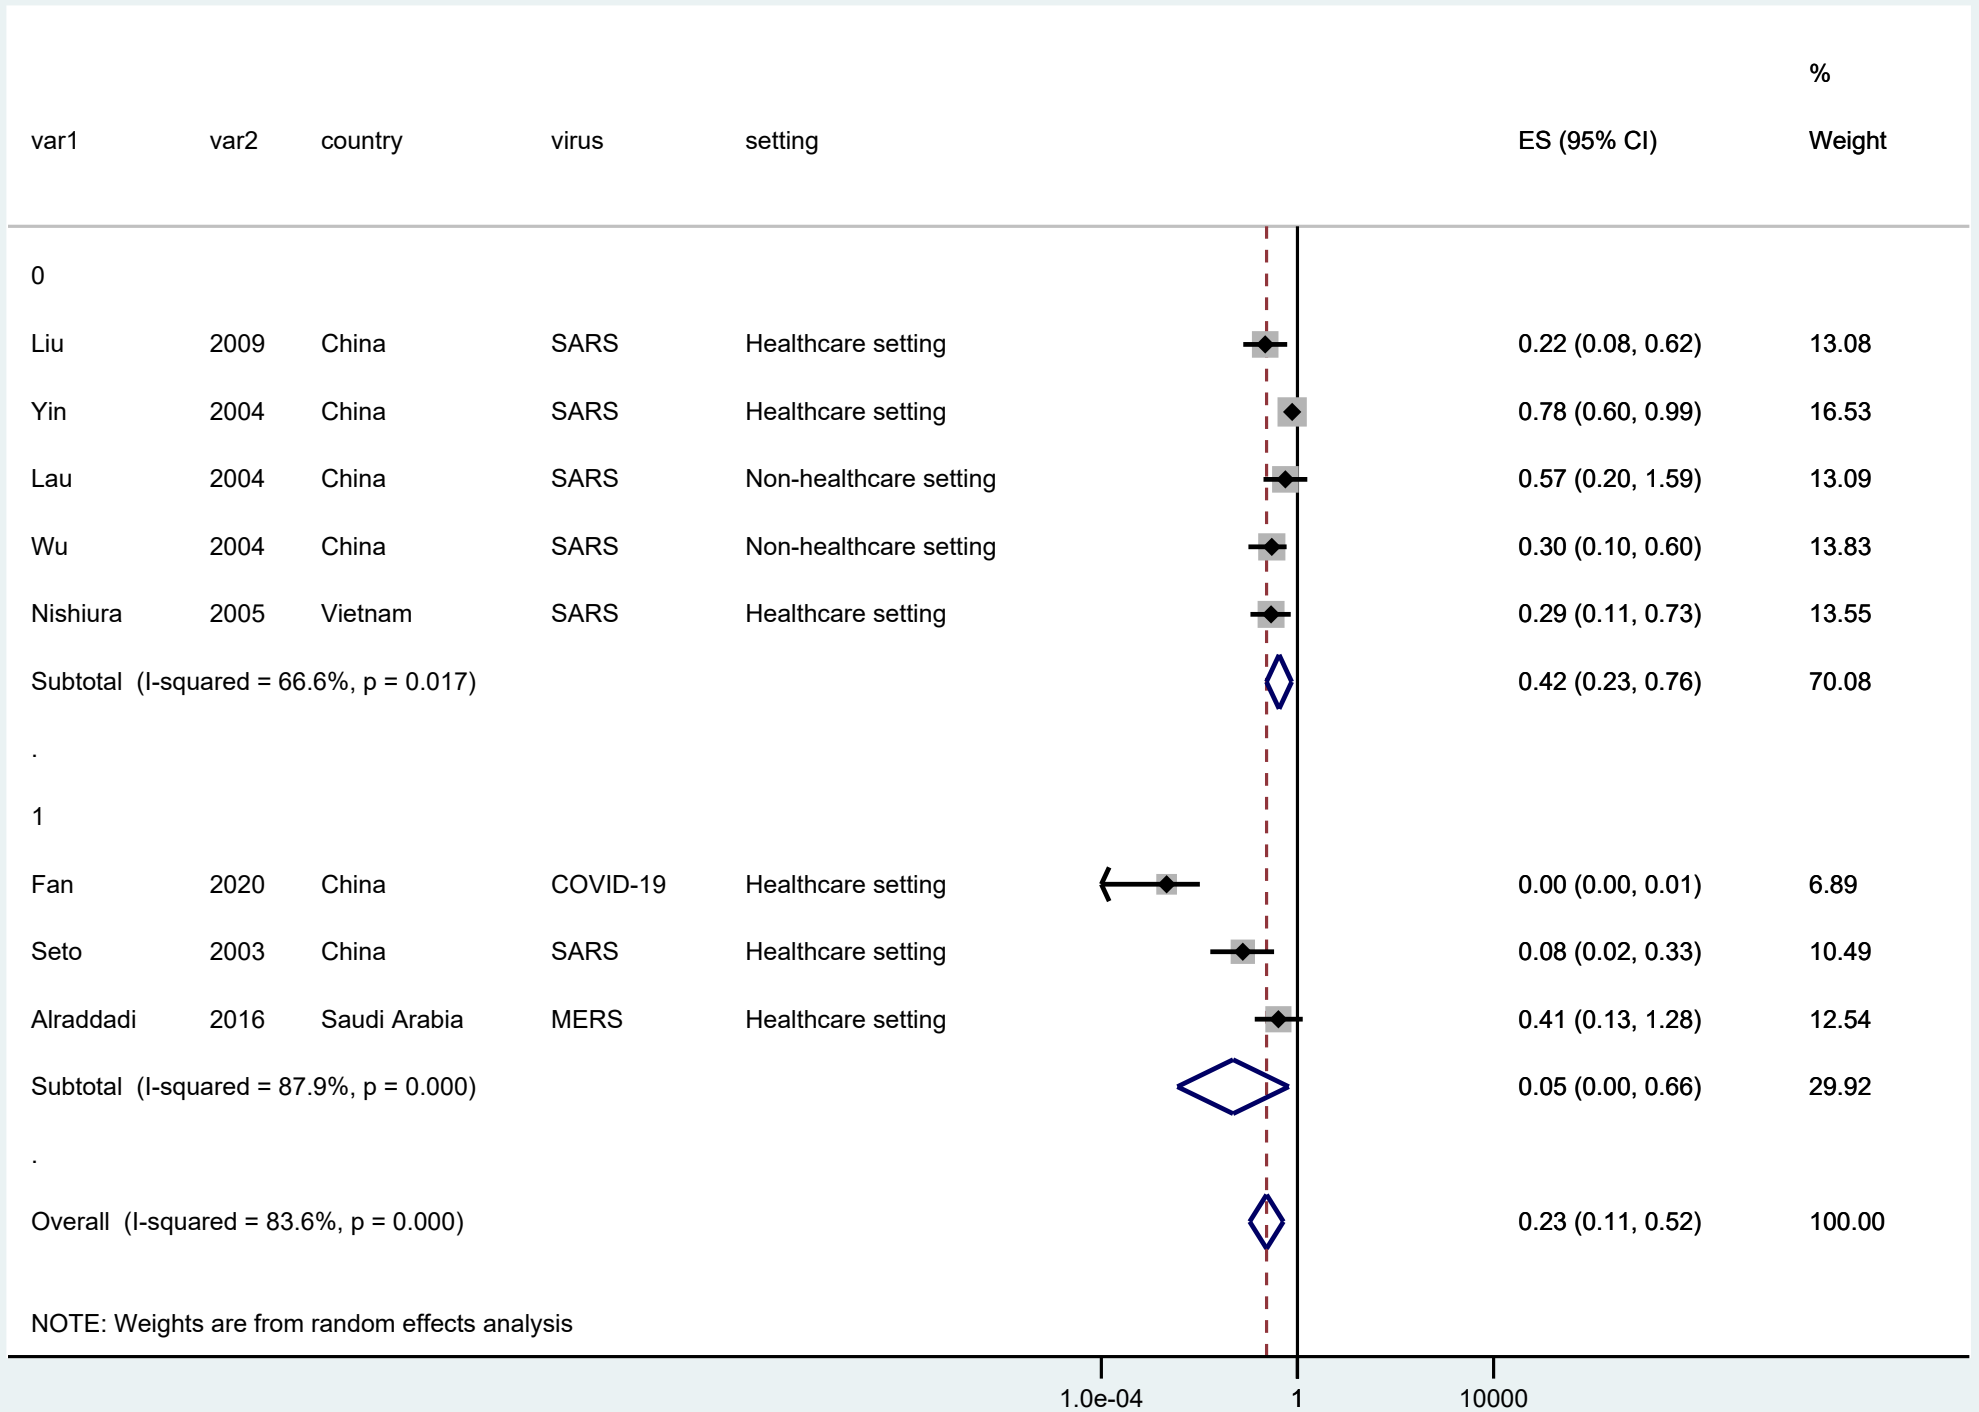

Forest plot showing the association of eye protection with risk of COVID-19, SARS, or MERS transmission

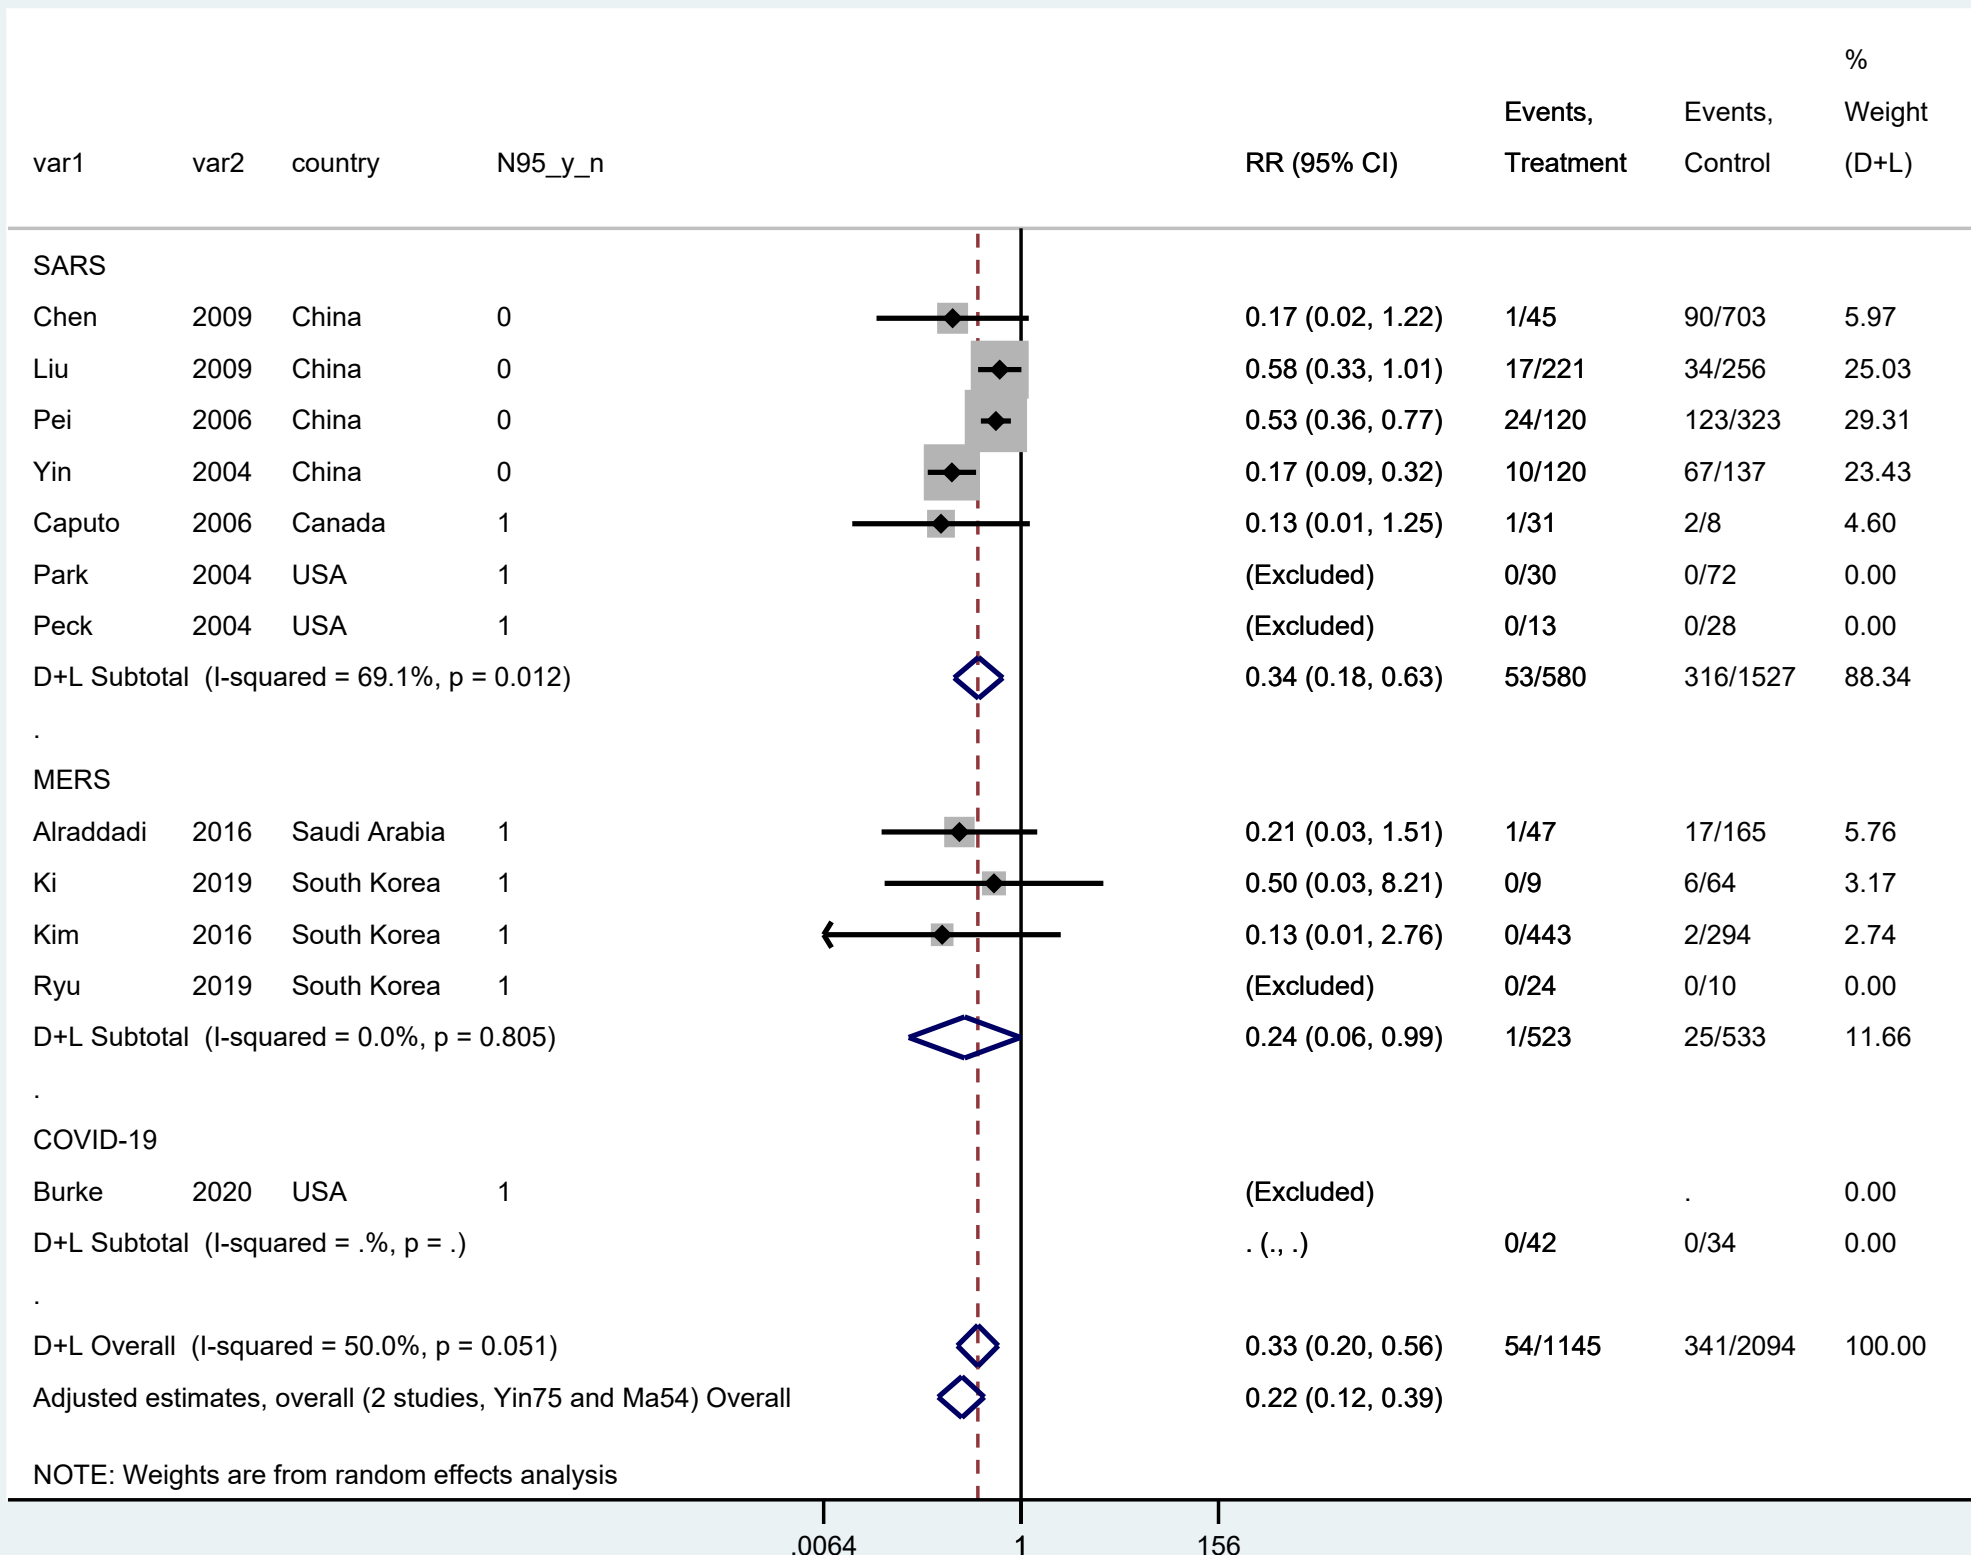

NOTE: Weights are from random effects analysis
